# Supplementary material for: Determination of the Immunoglobulin G Spectrum by Surface-Enhanced Raman Spectroscopy Using Quasispherical Gold Nanoparticles
Source: Hindawi journal article supplement (doi:10.1155/2021/8874193), 2021-01-18
Supplement: f1 [file 8874193.f1.docx]

**Determination of the immunoglobulin G spectrum by Surface-Enhanced Raman Spectroscopy using quasi-spherical gold nanoparticles**

**Supplementary material.**

**Section A.** **Characterization of AuNPs.**

**Morphological characterization**

TEM images of AuNPs were acquired using a JEOL JEM-2010 microscope operated at 200kV with a 0.2 nm resolution, with magnifications from x1000 to x80000. Figures 1,2, and 3 show the AuNPs at different magnifications.


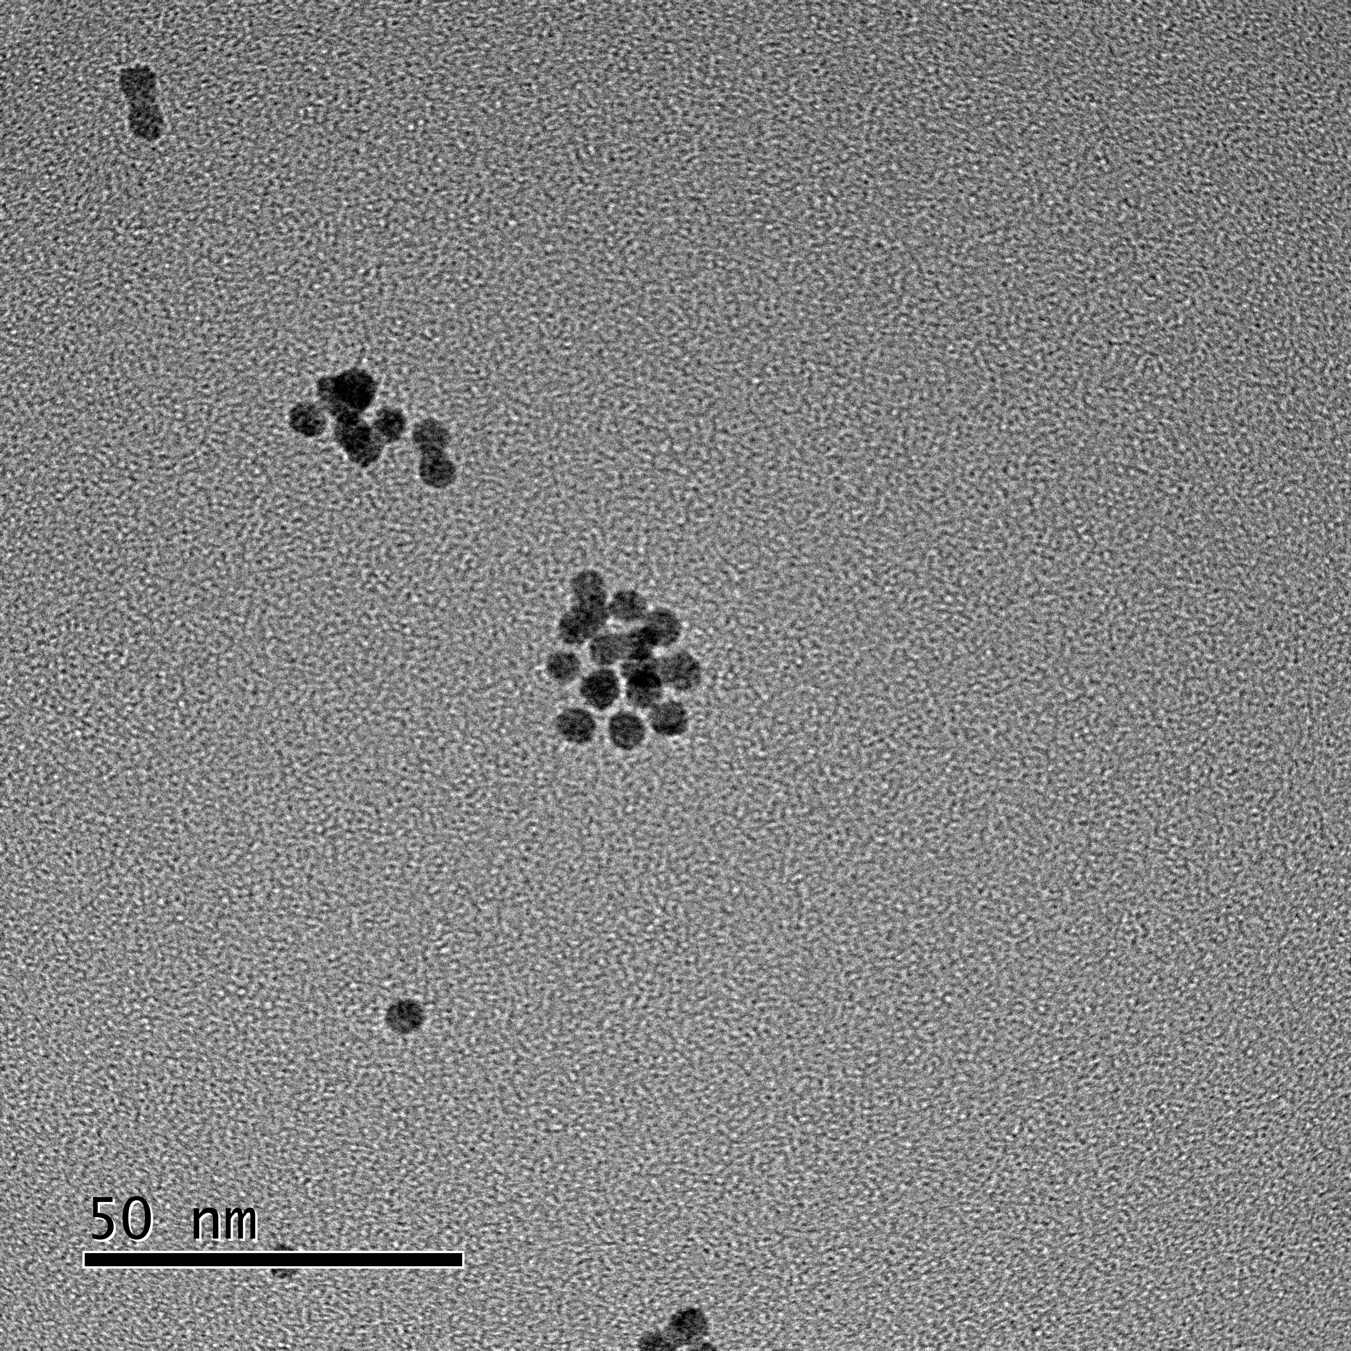


Figure 1. TEM image of AuNPs at a 50 nm scale.


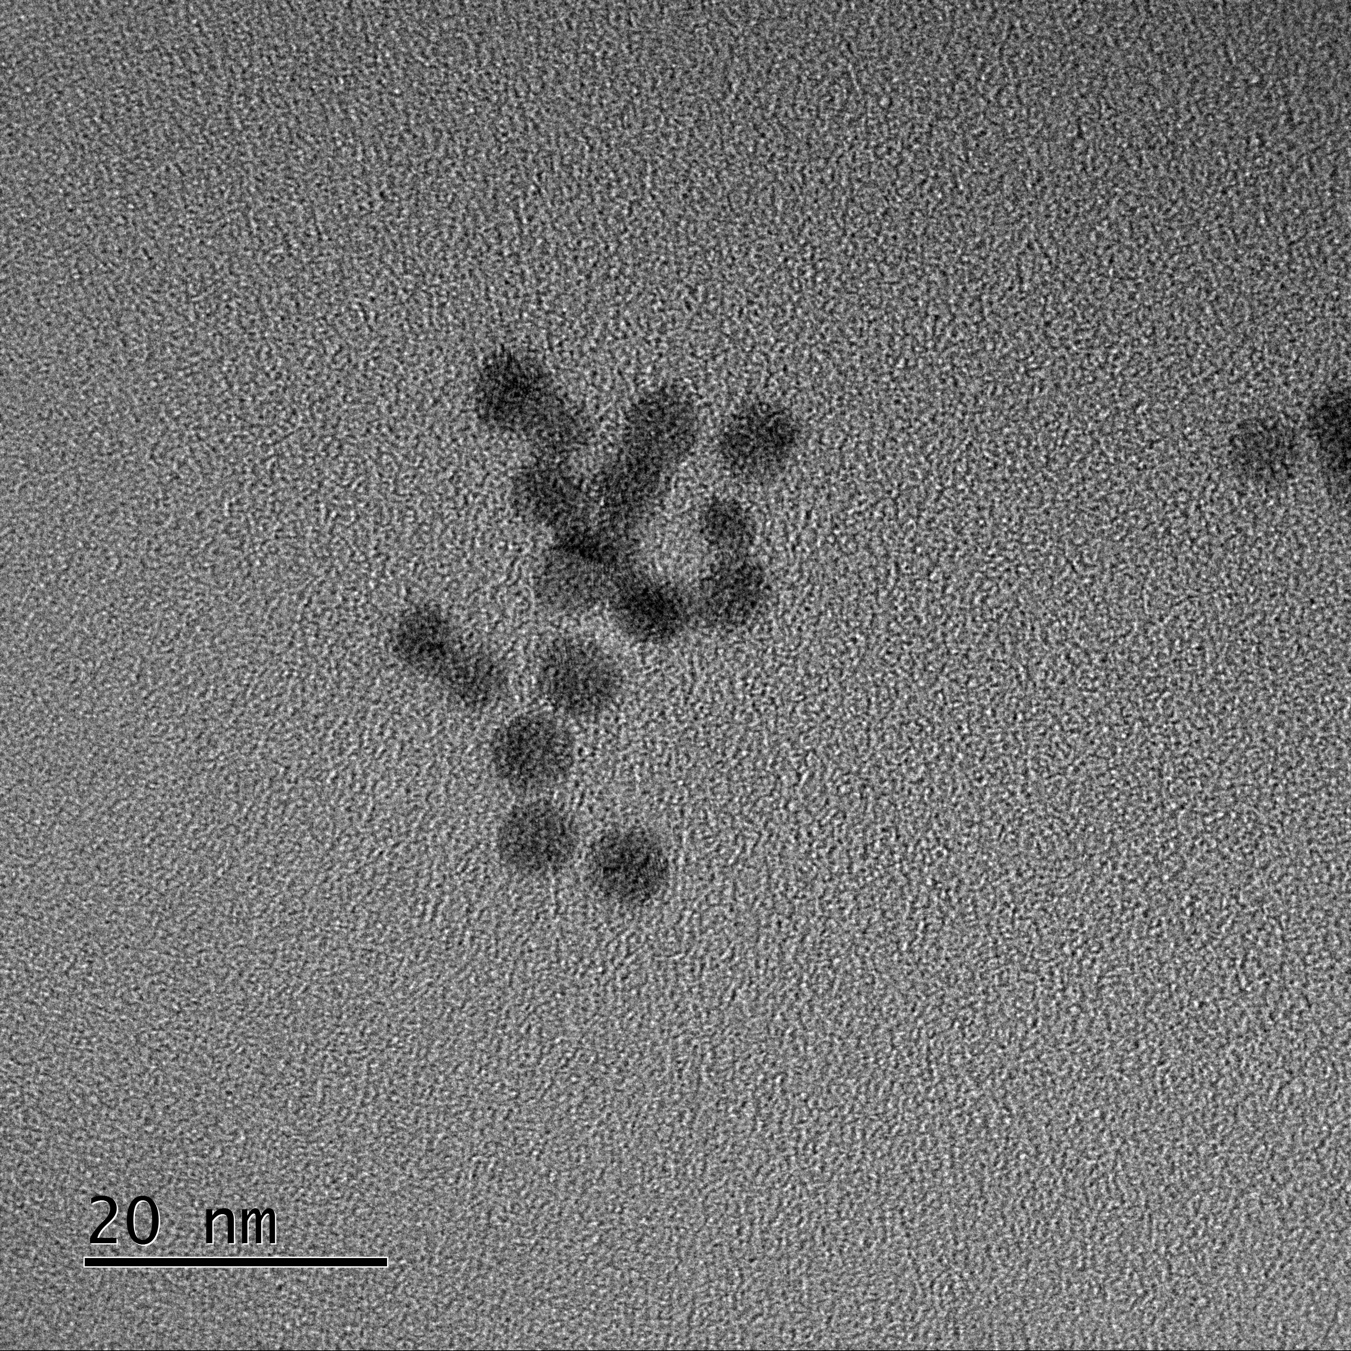


Figure 2. TEM image of AuNPs at a 20 nm scale.


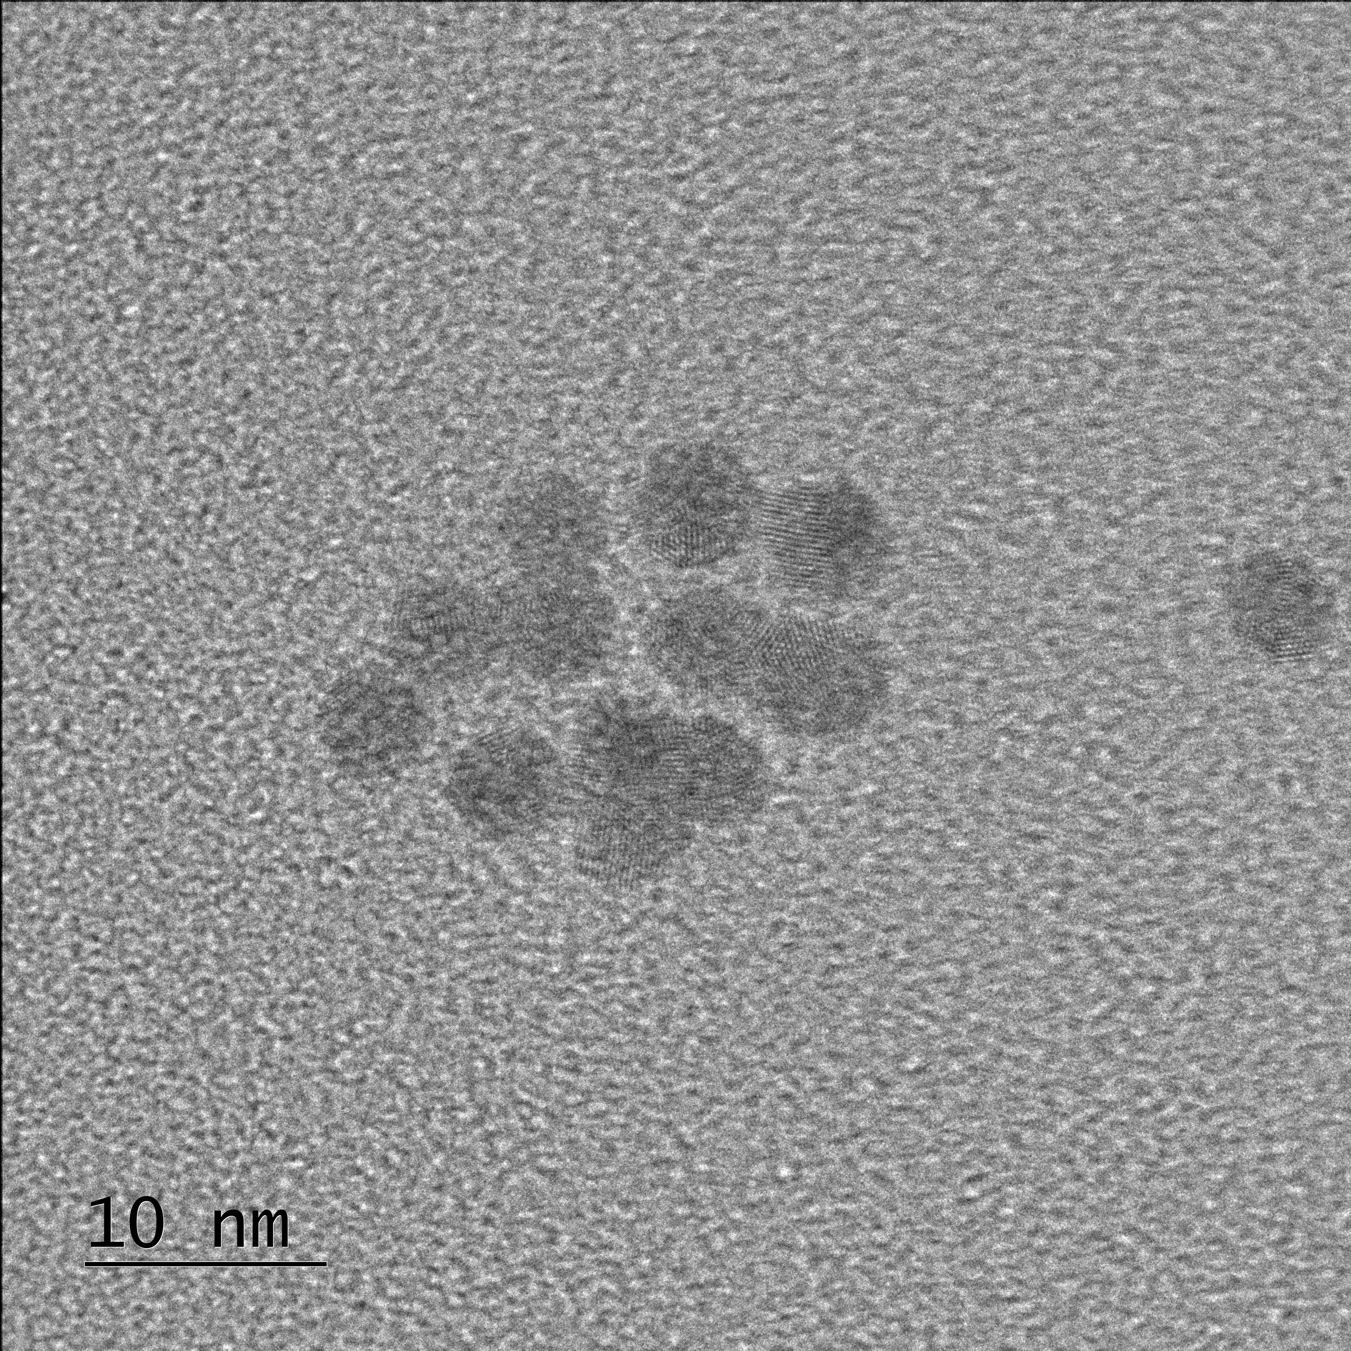


Figure 3. TEM image of AuNPs at a 10 nm scale.

**Optical characterization**

The transmission/absorbance optical spectra of the colloidal AuNPs showed a surface plasmons characteristic of the material obtained by using an Ocean Optics spectrometer, RED-TIDE USB650UV model, with a measuring range from 200 to 800 nm. Initial calibration was performed to subtract the baseline, then it was added 1.5 ml of AuNPs into the quartz cells and placed it into the instrument.


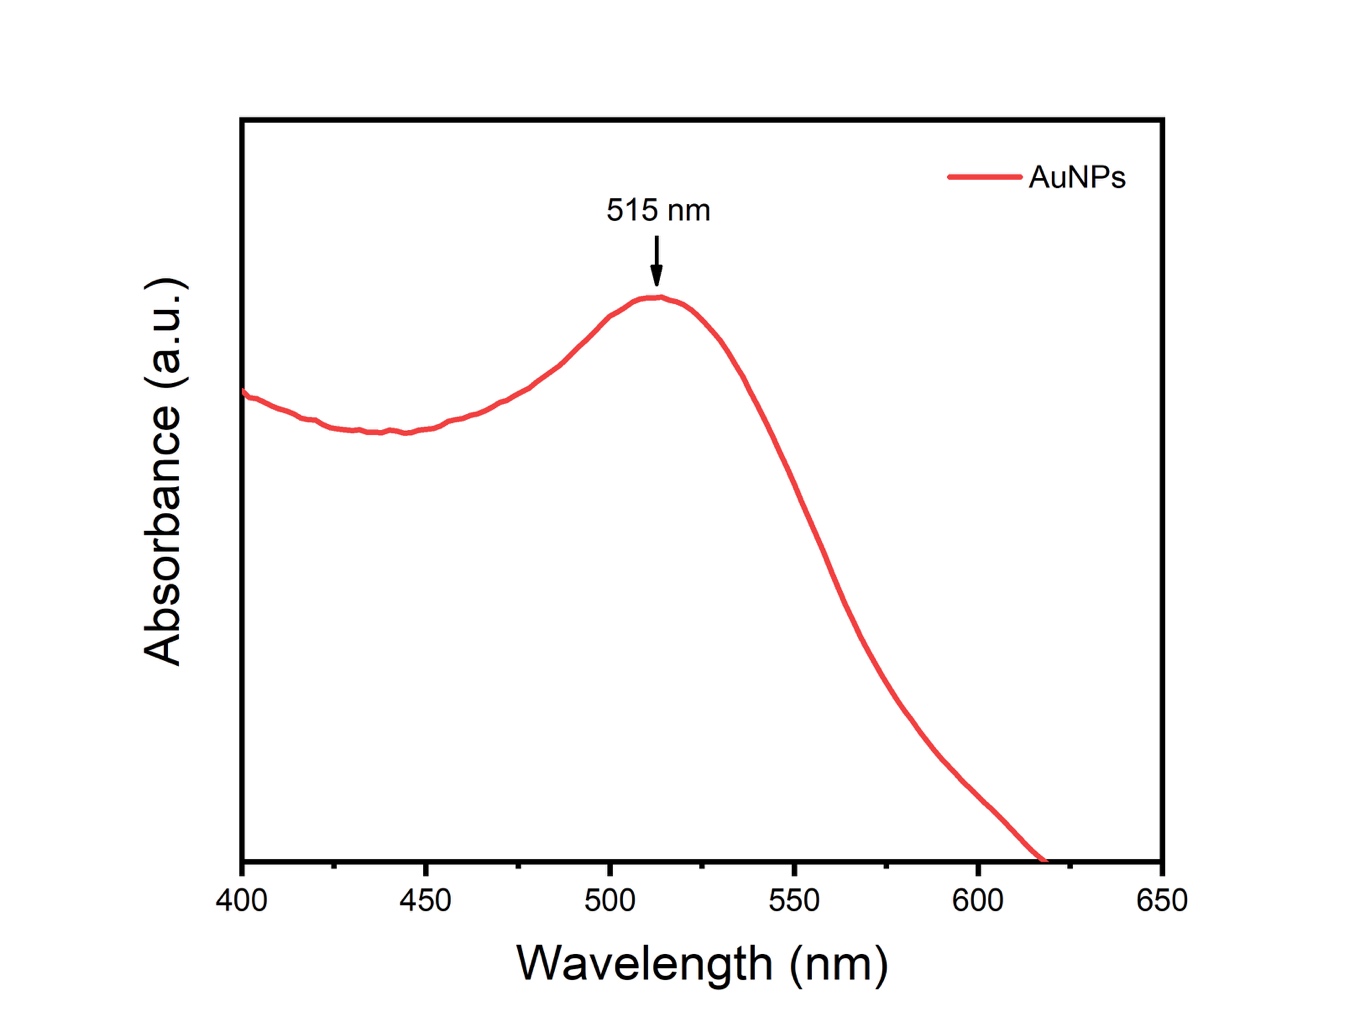


Figure 4. Optical spectra of the colloidal AuNPs.

**Dynamic Light Scattering (DLS)**

Additionally, the diameter distribution of AuNPs was determined from DLS. It was obtained a mean size of 4.5 (± 0.4 nm). Figure 2 shows the size distribution of the AuNPs got through the DLS technique.

Figure 5. The size distribution of the obtained AuNPs through the DLS technique.
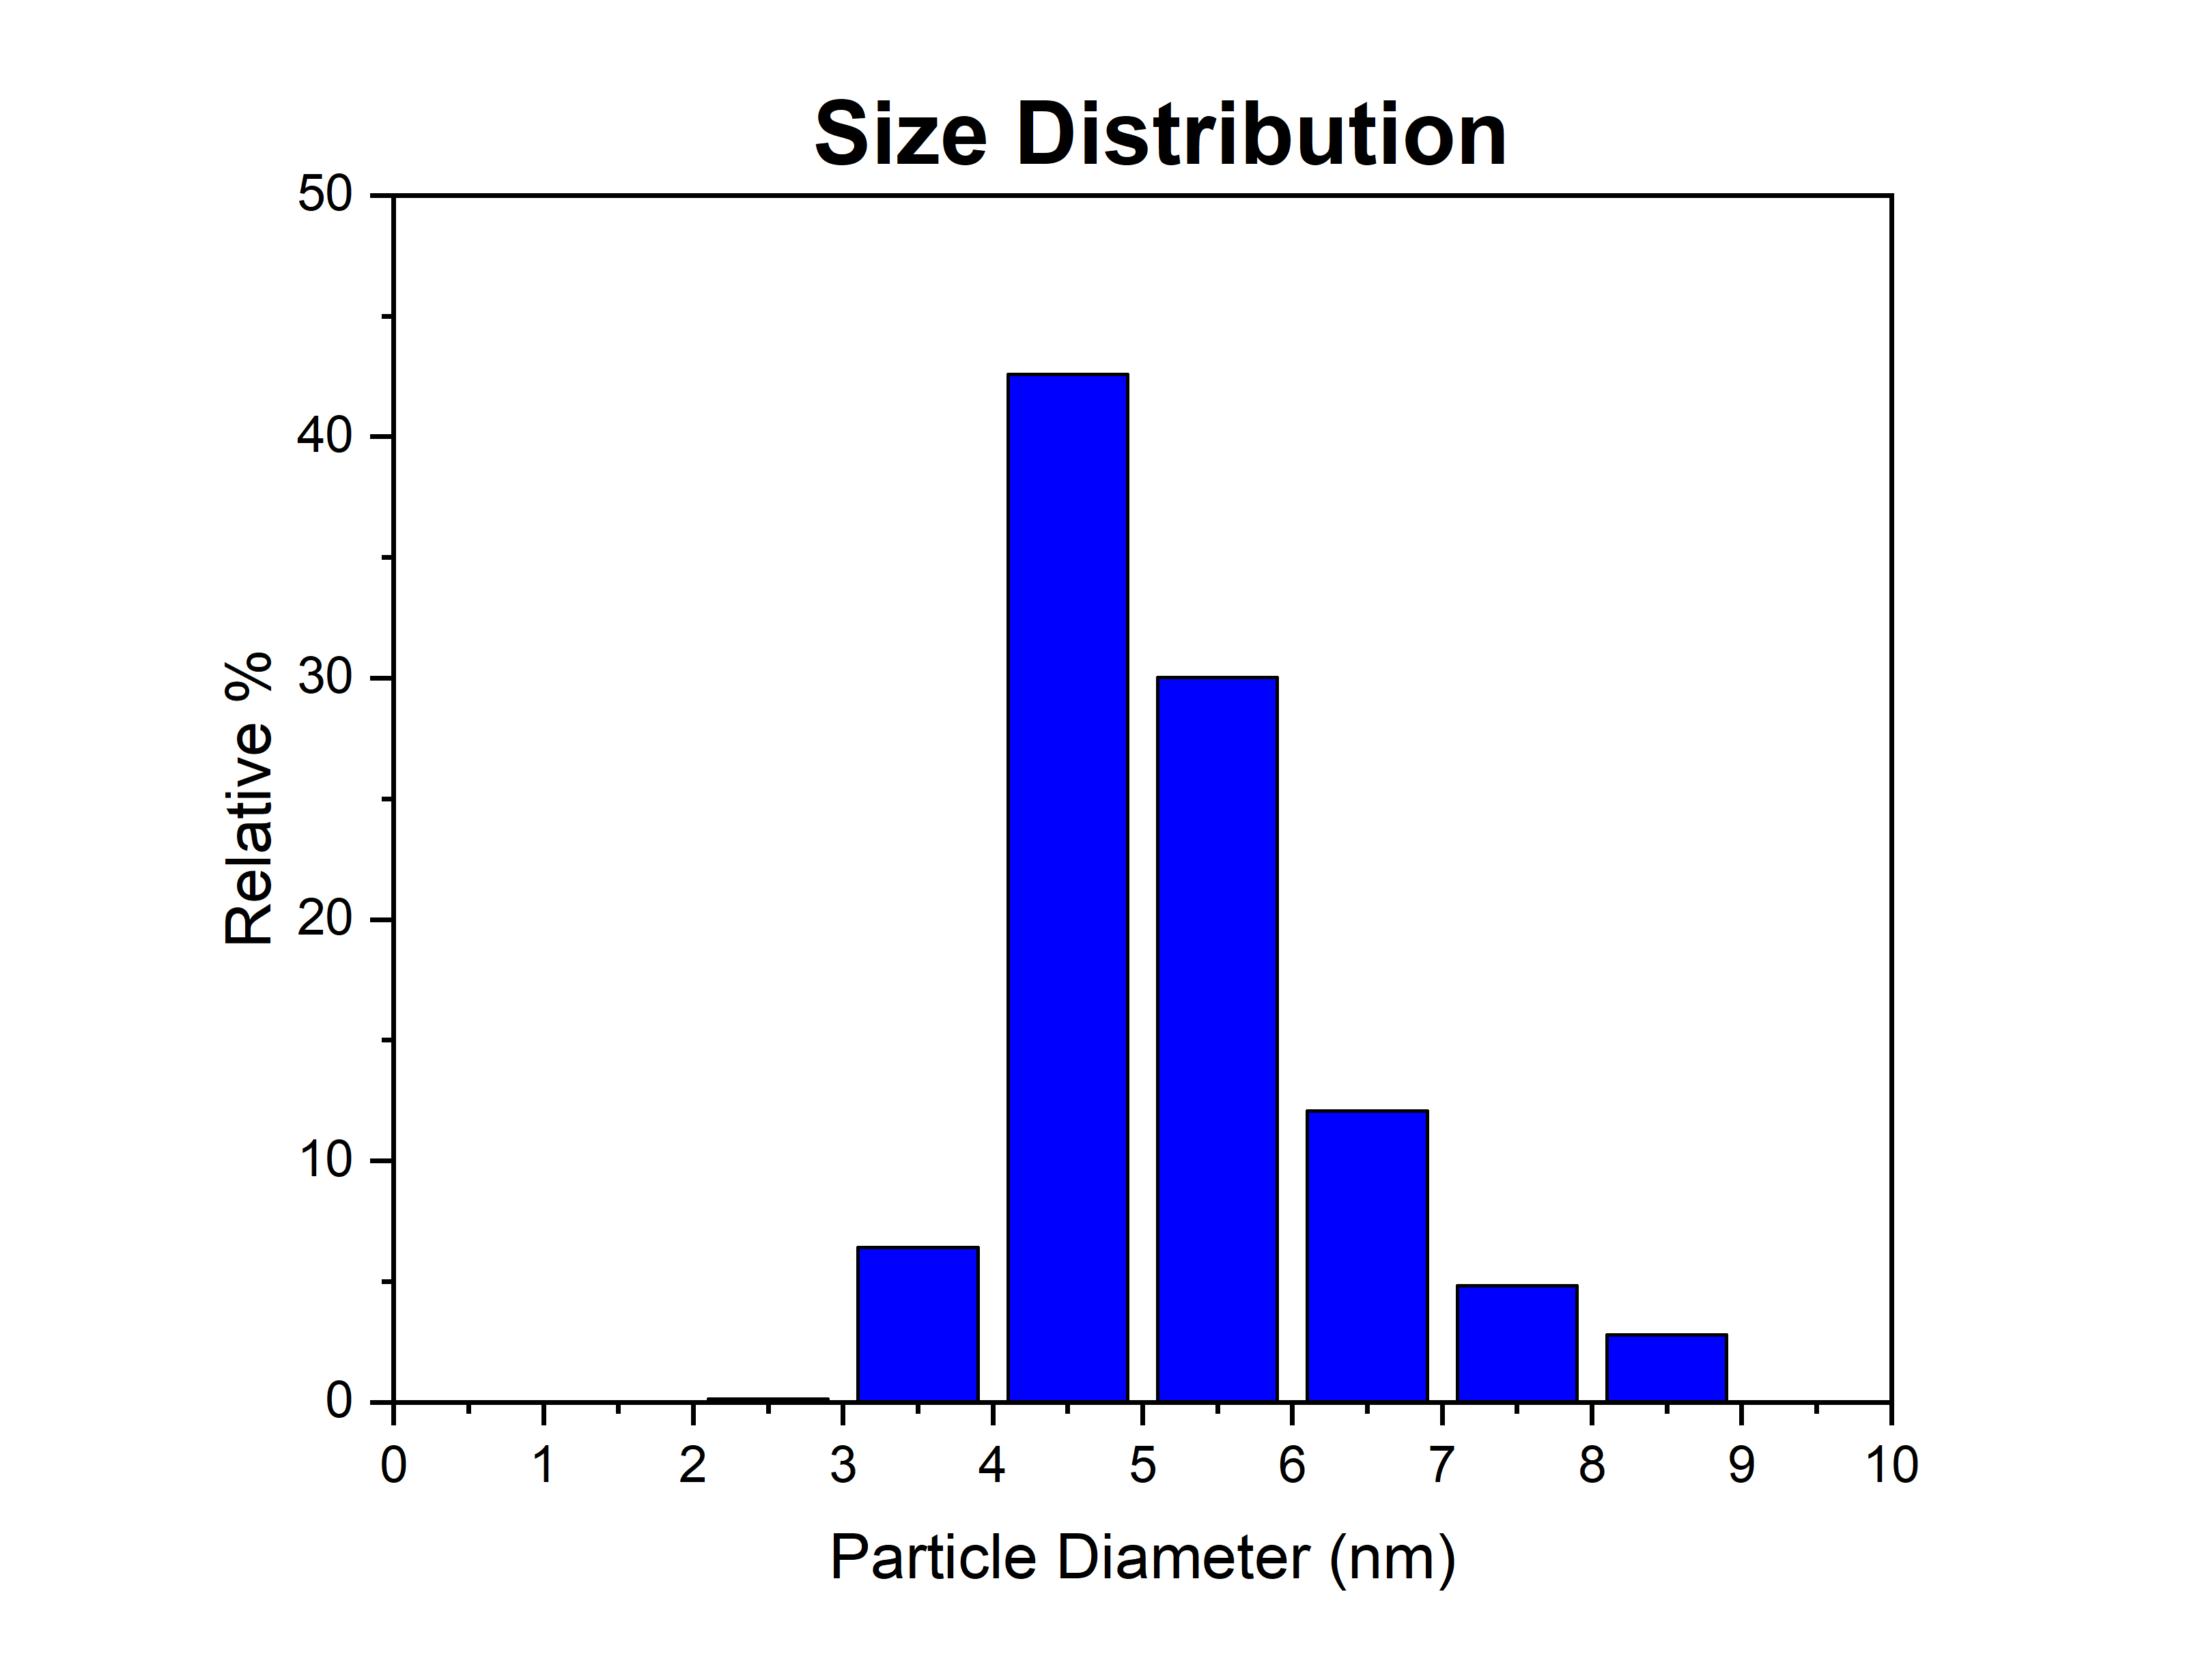


**Section B**. **Enhancement factor calculation**. Obtained from MATLAB software using the Estimation of Surface-Enhanced Raman Spectroscopy (SERS) enhancement factor. The values used are listed: Wavenumber (Raman Shift), Raman spectrum, SERS spectrum, Characteristic Raman band (1001 cm-1), the wavelength of the incident laser (785 nm), Molecular weight of the molecule under test (150 g/mol), the density of the molecule (0.05 g/cm3), the numerical aperture of the objective (0.471) and surface area of the molecule under test (27.7 nm).

Figure 6. IVIG SERS enhancement factor.
